# Supplementary material
Source: Springer Nature journal article supplement (https://www.springermedizin.de/resource/supplementary/12879_2007_541_MOESM2_ESM.pdf/9449162)

FIG. 2

A.

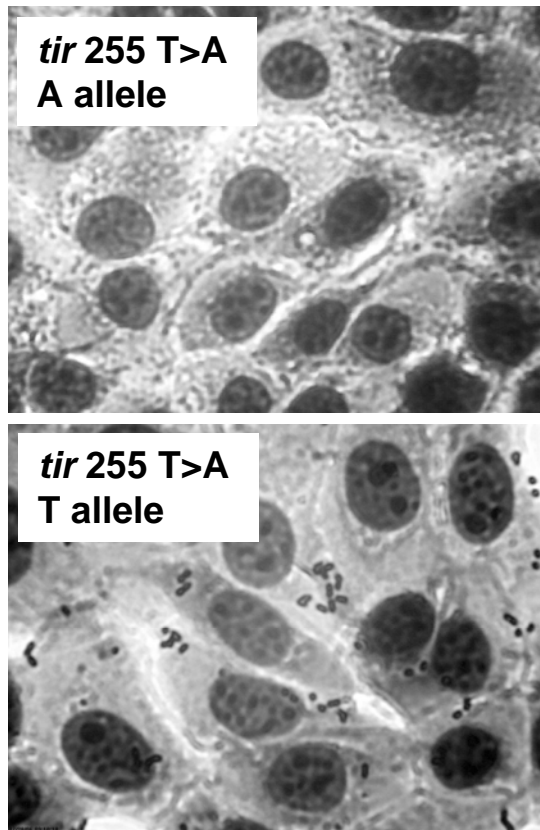

B.

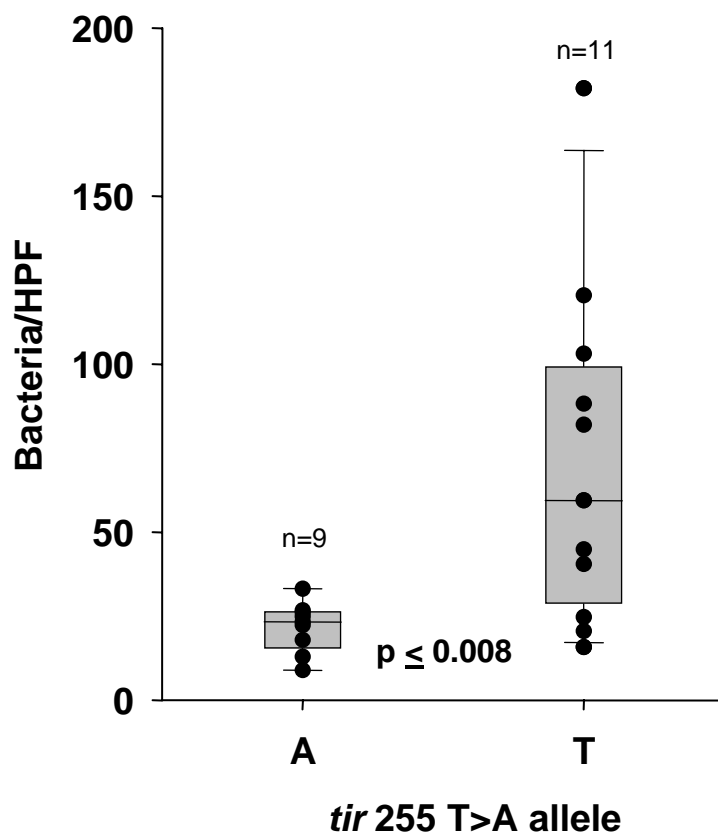

Supplement: MOESM2 [file 9449162]
